# Supplementary material for: A Core and Valence Level Spectroscopy Study of the Enhanced Reduction of CeO<sub>2</sub> by Iron Substitution. Implication on the Thermal Water Splitting Reaction.
Source: Preprints.org preprint supplement (doi:10.20944/preprints202312.1685.v1), 2023-12-22
Supplement: Supplementary file 1 [file supplementary]

# Core and valence level spectroscopy study of the enhanced reduction of CeO2 by iron substitution. Implication on the thermal water splitting activity.

Hicham Idriss

Institute of Functional Interfaces, Karlsruhe Institute of Technology (KIT), 76344 Eggenstein-Leopoldshafen, Germany


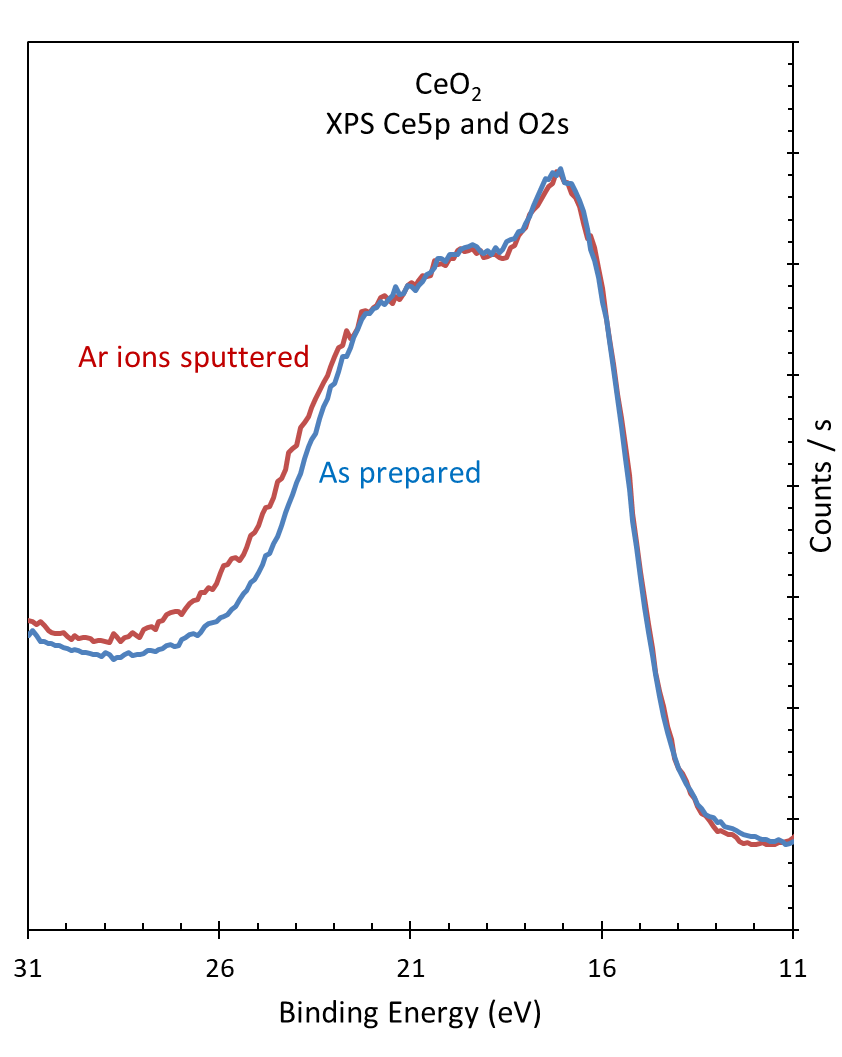


# Figure S1.

Normalized XPS Ce5p and O2s of as prepared CeO2 and after 5-minute argon ions sputtering.


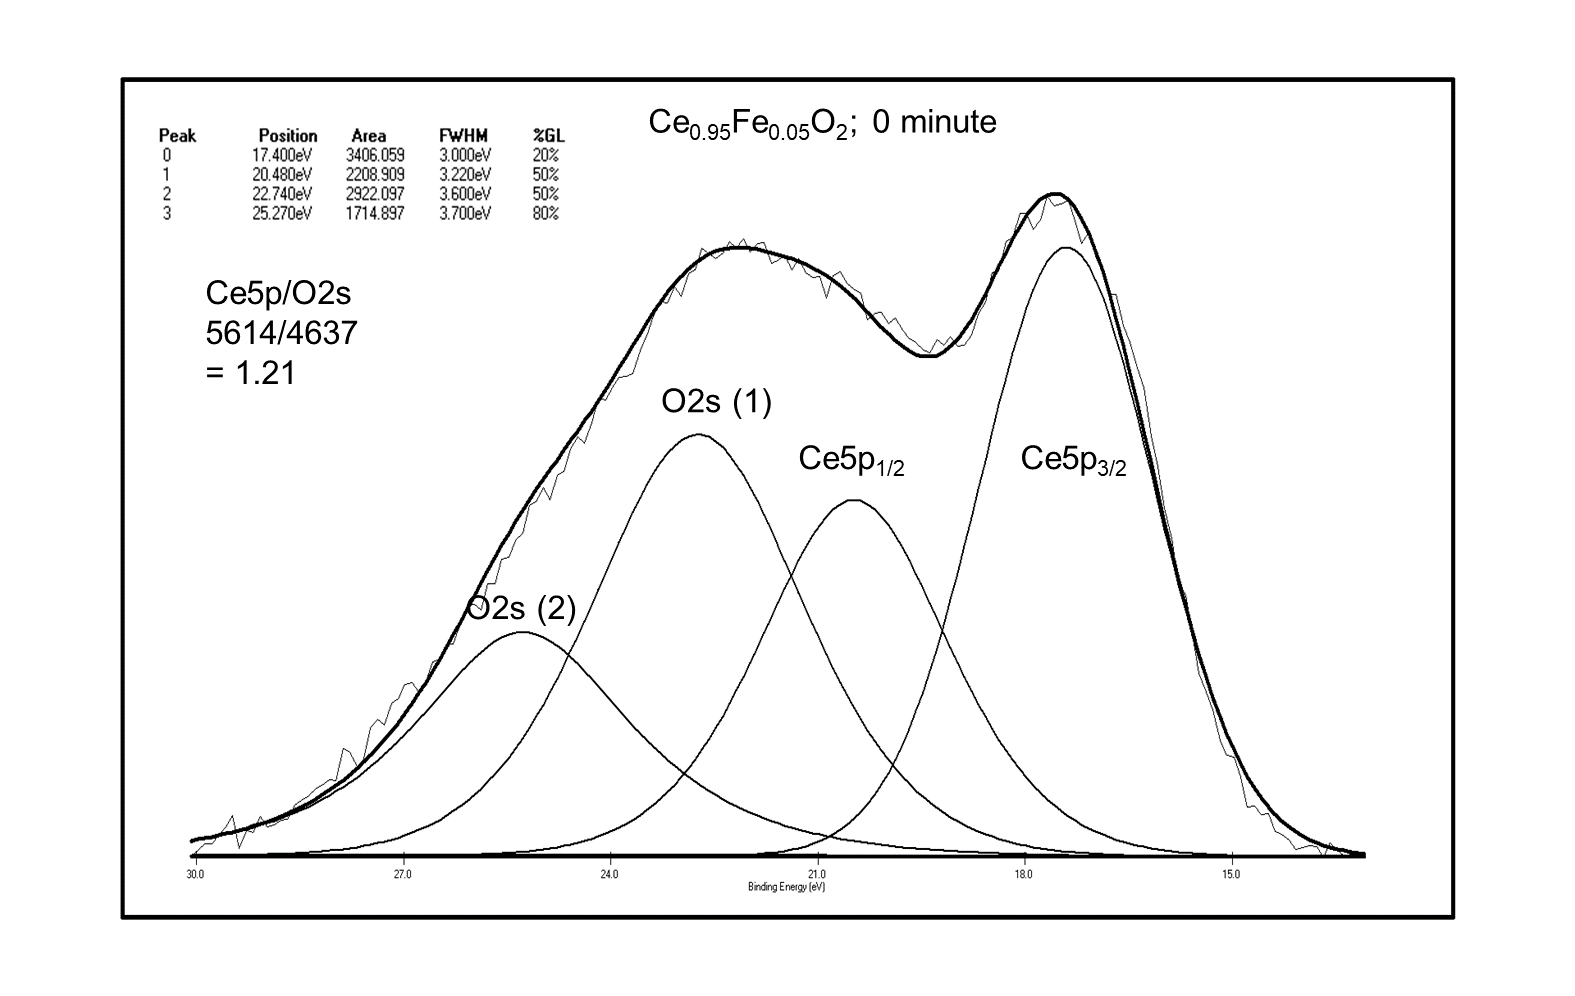
A


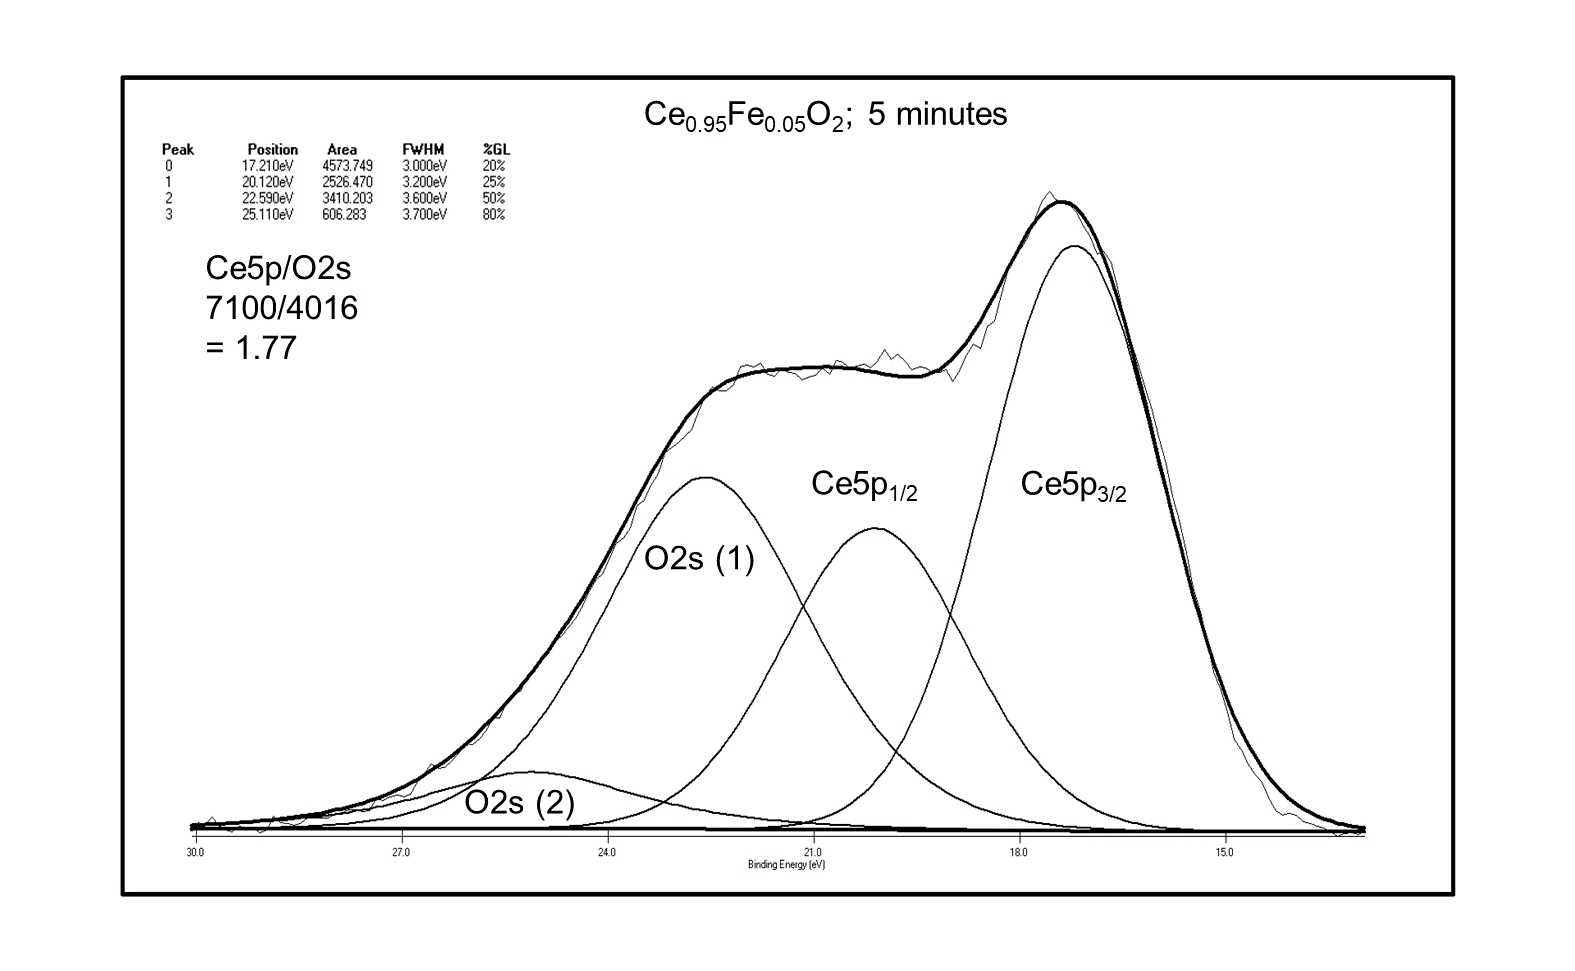
B


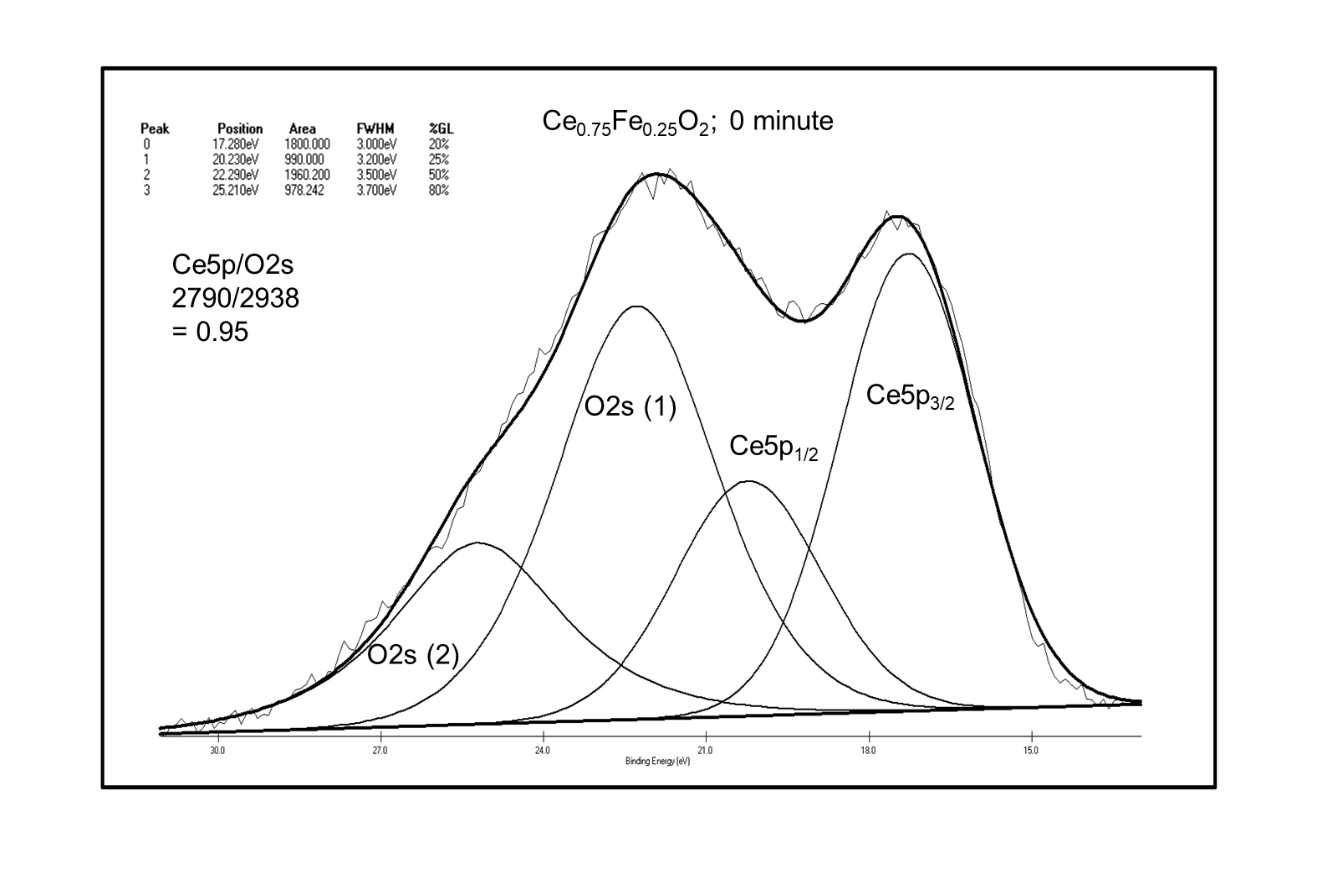
C


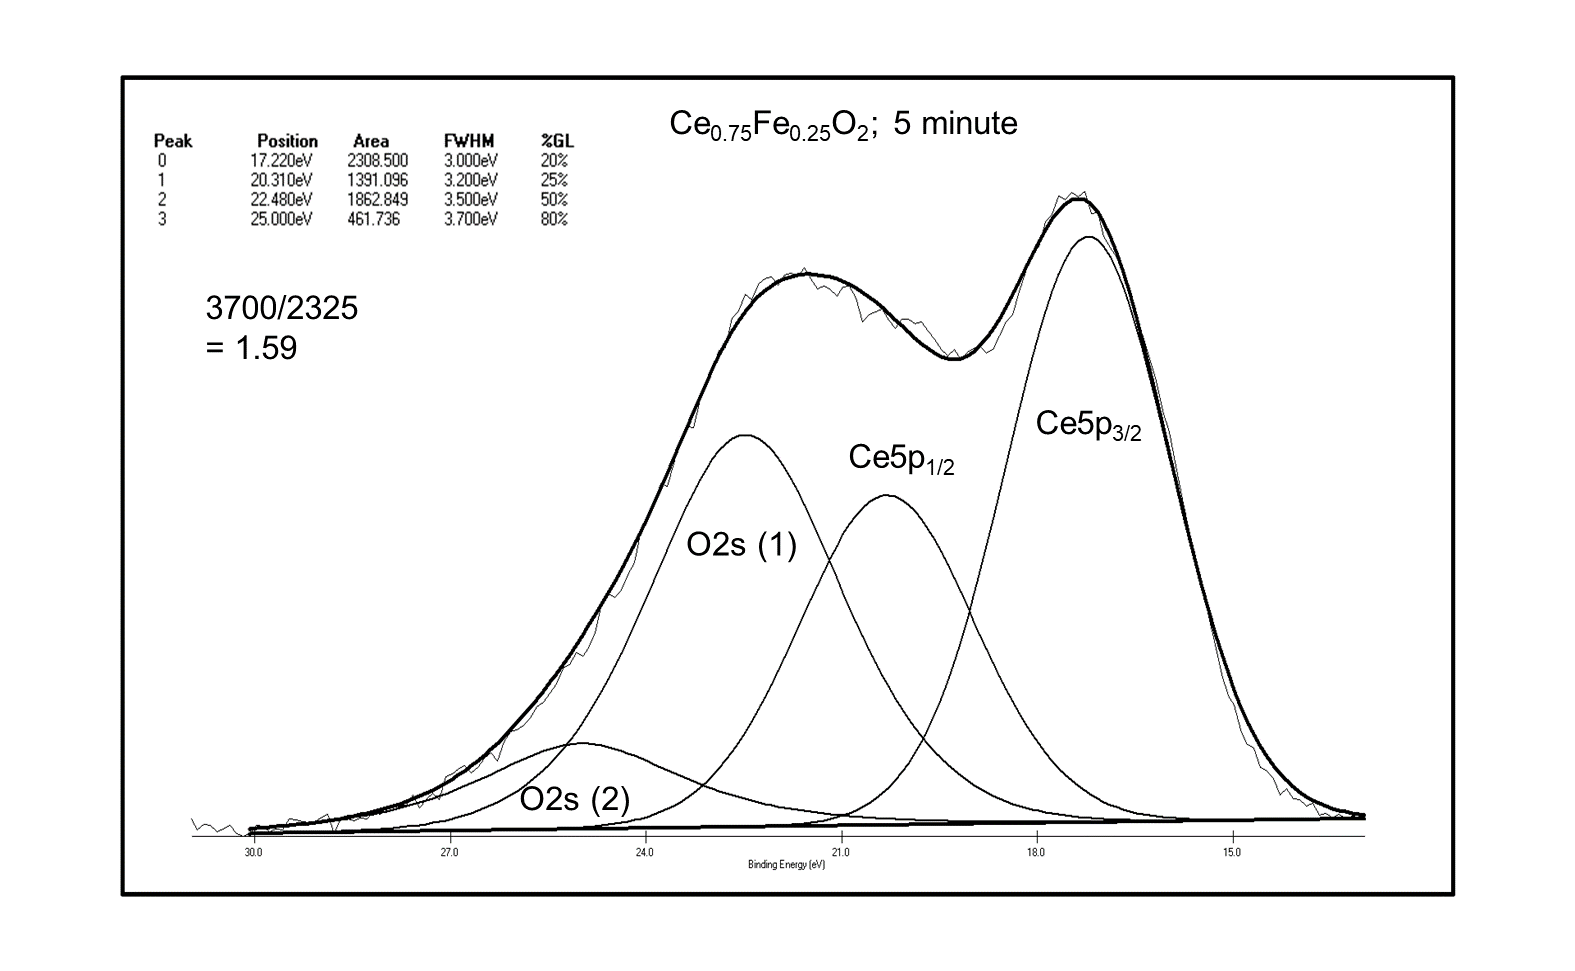
D

# Figure S2

Curve fitting of the XPS Ce5p and O2s peaks for the fresh A and C and Argon ions sputtered B and D Ce0.95Fe0.05O2 and Ce0.75Fe0.25O2, respectively.
